# Supplementary material
Source: PubMed Central journal article supplement (PMC3537137)
Supplement: embor2012182s2.pdf [file embor2012182s2.pdf]

Table S1. Primer list

|                                                              |                                             |                                                            |                |                |
|--------------------------------------------------------------|---------------------------------------------|------------------------------------------------------------|----------------|----------------|
| Taqman primers (used for CHIP and Copy number determination) | taq-40nt1-F                                 | AAT GAA AGA CCC CAC CTG TAG GT                             |                |                |
|                                                              | taq-40nt94-R                                | AAA TGG CGT TAC TTA AGC TTG GA                             |                |                |
|                                                              | taq-40nt40-Probe                            | /56-FAM/TCC TCC ACA CAC CAT CAC TCA CTC TTT CTC /36-TAMSp/ |                |                |
|                                                              | taq-PBS589-F                                | AGG GTC TCC TCT GAG TGA TTG ACT                            |                |                |
|                                                              | taq-PBS731-R                                | TCG GAC AGA CAC AGA TAA GTT GCT                            |                |                |
|                                                              | taq-PBS653-Probe                            | /56-FAM/ATC GGG AGA CCC CTG CCC AGG /36-TAMSp/             |                |                |
| ChIP primers (qPCR, Syber Green)                             | PBS-F                                       | TGG CCA GCA ACT TAT CTG TG                                 |                |                |
|                                                              | PBS-R                                       | CAG GCG CAT AAA ATC AGT CA                                 |                |                |
|                                                              | MLV PBS CHIP, F                             | GTA AAA ACT CCA CAC TCG GC                                 |                |                |
|                                                              | MLV PBS CHIP, R                             | ACG ATT CGG ATG CAA ACA GC                                 |                |                |
|                                                              | IAP PBS CHIP, F                             | CGT GAG AAC GCG TCG AAT AA                                 |                |                |
|                                                              | IAP PBS CHIP, R                             | TTC TGG TTC TGG AAT GAG GG                                 |                |                |
|                                                              | L-mChip-Polrmt                              | AGA CAC CTG CTG CCC TAT GT                                 |                |                |
|                                                              | R-mChip-Polrmt                              | GCT CCA TCC CAG TGC TTT AC                                 |                |                |
|                                                              | L-mChip-mest                                | CGT GGT CCA AGG GAT ATG TT                                 |                |                |
|                                                              | R-mChip-mest                                | TGA AGA AAG CCT TCC CAT GT                                 |                |                |
|                                                              | mES_Bmp2_Fd                                 | CCG ATC ACC TCT CTT CCT CA                                 |                |                |
|                                                              | mES_Bmp2_Rev                                | CTG GGC TTC TGT TGC TTT TC                                 |                |                |
|                                                              | mES_Gapdh_A+_Fd                             | ACC TTT AGC CTT GCC CTT T                                  |                |                |
|                                                              | mES_Gapdh_A+_Rev                            | ACA TCA CCC CCA TCA CTC AT                                 |                |                |
| L-m-Aprt                                                     | GGG ATA TCT CGC CCC TCT T                   |                                                            |                |                |
| R-m-Aprt                                                     | CAC TCG CCT GCG ATG TAG T                   |                                                            |                |                |
| RT-qPCR primers                                              | Hp1gExon5-L                                 | CAG AGG TCT CGA CCC TGA AC                                 |                |                |
|                                                              | Hp1gExon5/6-R                               | GTC CGA GTC CTT CCA CTT CA                                 |                |                |
|                                                              | CYCAxon3-L                                  | GAG CTC TGA GCA CTG GAG AGA                                |                |                |
|                                                              | CYCAxon3/4-R                                | CCA CCC TGG CAC ATG AAT                                    |                |                |
|                                                              | CYCBxon2-L                                  | ACG AGT CGT CTT TGG ACT CTT T                              |                |                |
|                                                              | CYCBxon2/3-R                                | GCC AAA TCC TTT CTC TCC TGT A                              |                |                |
|                                                              | UBC-L                                       | CAG CCG TAT ATC TTC CCA GAC T                              |                |                |
|                                                              | UBC-R                                       | CTC AGA GGG ATG CCA GTA ATC TA                             |                |                |
|                                                              | GAPDH-L                                     | CAG CCG TAT ATC TTC CCA GAC T                              |                |                |
|                                                              | GAPDH-R                                     | CTC AGA GGG ATG CCA GTA ATC TA                             |                |                |
|                                                              | Oct4-exon1/2-L                              | AAC CAA CTC CCG AGG AGT CCC A                              |                |                |
|                                                              | Oct4-exon2-R                                | TCT TCT GCT TCA GCA GCT TGG CA                             |                |                |
|                                                              | 40nt-L                                      | CTC CTC CAC ACA CCA TCA CT                                 |                |                |
|                                                              | out40nt-R                                   | CTG TTC CTG ACC TTG ATC TGA A                              |                |                |
|                                                              | MERVL-F                                     | ATC TCC TGG CAC CTG GTA TG                                 |                |                |
|                                                              | MERVL-R                                     | AGA AGA AGG CAT TTG CCA GA                                 |                |                |
|                                                              | GFP-L                                       | CTC GTG ACC ACC TTG ACC TA                                 |                |                |
|                                                              | GFP-R                                       | GAA GAA GTC GTG CTG CTT CA                                 |                |                |
| Bisulfite nested primers                                     | bis40nt(88)L                                | GTT ATT TTG TAA GGT ATG GAA AAA                            | out            | Length: 640bp  |
|                                                              | bis40nt(727)R                               | ACA AAC ACA AAT AAA TTA CTA ACC A                          |                |                |
|                                                              | bis40nt(382)L                               | GAA ATG ATT TTG TGT TTT ATT TGA A                          | in             | Length: 334bp  |
|                                                              | bis40nt(715)R                               | AAA TTA CTA ACC AAC TTA CCT CCC                            |                |                |
|                                                              | bisGFP3-F                                   | GAG TTG AAG GGT ATY GAT TTT AA                             | Out            | Length: 400bp. |
|                                                              | bisGFP3-R                                   | CCC CCA TAC TCR AAA CAT A                                  |                |                |
|                                                              | bisGFP1-F                                   | TGG GGT ATA AGT TGG AGT ATA A                              | In             | Length: 232bp. |
|                                                              | bisGFP1-R                                   | TTC TCR TTA AAA TCT TTA CTC AA                             |                |                |
|                                                              | bisOct4(NF)extF                             | AAT TTT ATT TTT TAG TTT TGA TTT TTG G                      | Out            | Length: 385bp  |
|                                                              | bisOct4(NF)intR                             | TAA ACA AAA ACT AAA AAA TAA CCC CAA AAA T                  |                |                |
| bisOct4(NF)intF                                              | TGG GTG GGT GGA GGA GTA GAG TTG TGG GGG     |                                                            |                |                |
| bisOct4(NF)intR                                              | CTC TCC CAA AAA ATA ACT AAA TAA ACT ATA AAA | In                                                         | Length: 282bp. |                |
